# Supplementary material for: Synthesis of Tropine-Based Functionalized Acidic Ionic Liquids and Catalysis of Esterification
Source: MDPI journal article supplement (doi:10.3390/ijms232112877), 2022-10-25
Supplement: s1 [file s1]

## **Supplemental Material**

### **Synthesis of Tropine-Based Functionalized Acidic Ionic Liquids and Catalysis of Esterification**

#### **Table of content**

|                  |               |
|------------------|---------------|
| <b>Figure S1</b> | <b>page 3</b> |
| <b>Table S1</b>  | <b>page 4</b> |
| <b>Table S2</b>  | <b>page 5</b> |
| <b>Table S3</b>  | <b>page 6</b> |
| <b>Table S4</b>  | <b>page 7</b> |
| <b>Table S5</b>  | <b>page 8</b> |

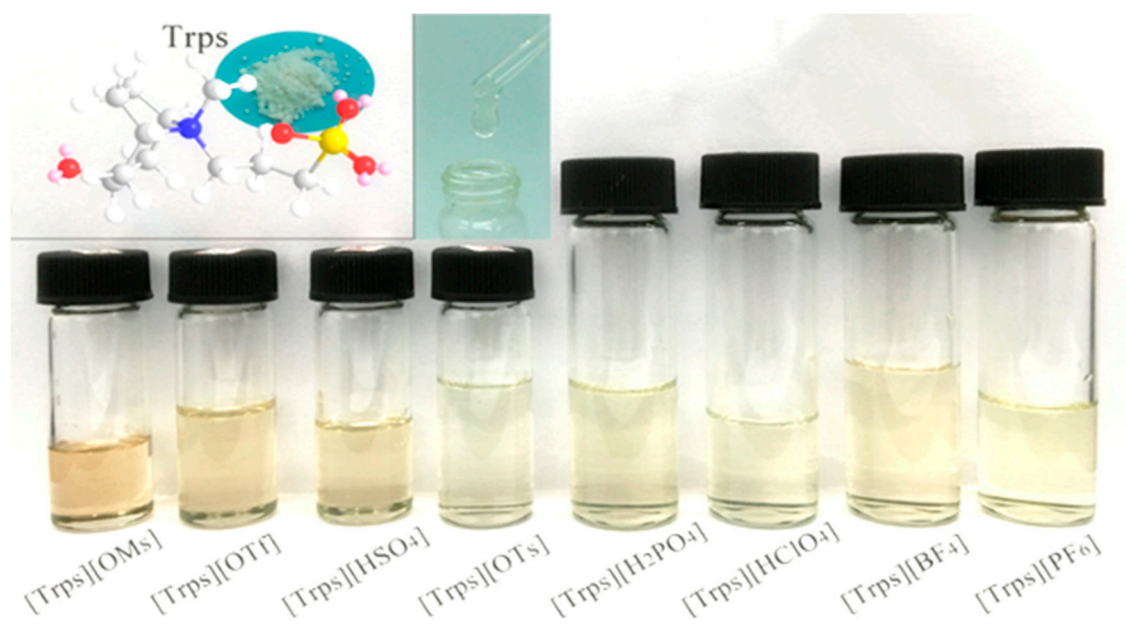

**Figure S1.** The photos of [Trps][anion]

**Table S1.** Test factor level and coding table of the response surface method.

| Factor         | Levels |    |     |
|----------------|--------|----|-----|
|                | -1     | 0  | 1   |
| X <sub>1</sub> | 60     | 80 | 100 |
| X <sub>2</sub> | 10     | 30 | 50  |
| X <sub>3</sub> | 1      | 2  | 3   |
| X <sub>4</sub> | 0.5    | 1  | 1.5 |

**Table S2.** The test design table and results of response surface method analysis.

| Number | X1 | X2 | X3 | X4 | Yield(%) |
|--------|----|----|----|----|----------|
| 1      | 0  | 0  | -1 | 1  | 70.72    |
| 2      | 1  | 0  | 0  | -1 | 71.71    |
| 3      | -1 | -1 | 0  | 0  | 38.38    |
| 4      | 1  | -1 | 0  | 0  | 51.51    |
| 5      | -1 | 0  | 1  | 0  | 65.65    |
| 6      | 0  | 1  | 1  | 0  | 81.81    |
| 7      | 0  | 0  | 0  | 0  | 80.82    |
| 8      | -1 | 0  | 0  | 1  | 67.67    |
| 9      | 0  | 0  | -1 | -1 | 61.61    |
| 10     | 0  | -1 | -1 | 0  | 41.41    |
| 11     | 0  | 0  | 1  | 1  | 88.88    |
| 12     | 0  | 0  | 0  | 0  | 80.84    |
| 13     | 1  | 0  | 1  | 0  | 78.78    |
| 14     | -1 | 1  | 0  | 0  | 60.62    |
| 15     | 1  | 0  | 0  | 1  | 80.83    |
| 16     | 0  | 1  | 0  | 1  | 83.83    |
| 17     | 0  | 1  | 0  | -1 | 74.74    |
| 18     | 1  | 0  | -1 | 0  | 60.61    |

|    |    |    |    |    |       |
|----|----|----|----|----|-------|
| 19 | -1 | 0  | -1 | 0  | 47.47 |
| 20 | 0  | -1 | 0  | 1  | 61.61 |
| 21 | 1  | 1  | 0  | 0  | 73.73 |
| 22 | 0  | 0  | 0  | 0  | 80.86 |
| 23 | -1 | 0  | 0  | -1 | 58.58 |
| 24 | 0  | 0  | 0  | 0  | 80.87 |
| 25 | 0  | 0  | 0  | 0  | 80.89 |
| 26 | 0  | -1 | 1  | 0  | 59.59 |
| 27 | 0  | 1  | -1 | 0  | 63.63 |
| 28 | 0  | 0  | 1  | -1 | 79.79 |
| 29 | 0  | -1 | 0  | -1 | 52.52 |

**Table S3.** FT-IR spectra analysis of Tropine, Trps and [Trps][OTs]

| The functional group vibrates          | Wave( $\text{cm}^{-1}$ ) | The functional group vibrates       | Wave( $\text{cm}^{-1}$ ) |
|----------------------------------------|--------------------------|-------------------------------------|--------------------------|
| Tropine                                |                          |                                     |                          |
| -OH                                    | 3390                     | C-N Asymmetric stretching vibration | 1471, 1425               |
| N-CH <sub>3</sub> , -CH <sub>2</sub> - | 2980~2880                | C-N Symmetric stretching vibration  | 1321,1225                |
| Vibration of bridge ring frame         | 1678, 1654               | C-O                                 | 1065                     |
| Trps                                   |                          |                                     |                          |
| -OH                                    | 3419                     | SO <sub>2</sub>                     | 1299                     |
| -CH <sub>3</sub>                       | 2963                     | S=O                                 | 1205, 1195               |
| -CH <sub>2</sub> -                     | 2909                     | C-S-O                               | 1108, 944                |
| -CH <sub>2</sub> , -CH <sub>3</sub>    | 1471,1452                | - (CH <sub>2</sub> ) -              | 715~800                  |
| C-N <sup>+</sup>                       | 1351, 1254               | -SO <sub>3</sub> <sup>-</sup>       | 621, 534                 |
| [Trps][OTs]                            |                          |                                     |                          |
| -OH                                    | 3430                     | S=O                                 | 1126                     |
| -CH <sub>3</sub> , -CH <sub>2</sub> -  | 2850~3000                | CHOH                                | 1040                     |
| Vibration of bridge ring frame         | 1640, 1494               | C-S-O                               | 1011, 942                |
| -CH <sub>2</sub> , -CH <sub>3</sub>    | 1461,1437                | Ar-H                                | 818                      |
| C-N <sup>+</sup>                       | 1399, 1310               | - (CH <sub>2</sub> ) -              | 689                      |
| SO <sub>2</sub>                        | 1206                     | -SO <sub>3</sub>                    | 616, 569                 |

**Table S4.** NMR data of ILs.

| IL          | Frequency | Solvent          | Chemical shift (ppm) and peak attribution                                                                                                                                                                                                                                                                |
|-------------|-----------|------------------|----------------------------------------------------------------------------------------------------------------------------------------------------------------------------------------------------------------------------------------------------------------------------------------------------------|
| Trps        | 400 MHz   | D <sub>2</sub> O | <p> <math>\delta</math>: 4.11 (t, J = 5.6 Hz, 1H), 3.86 (s, 2H), 3.46 (m, 1H), 3.37 (m, 2H), 2.99 (m, 3H), 2.93 (dd, J = 15.1, 7.9 Hz, 2H), 2.50 (d, J = 16.4 Hz, 2H), 2.42 (d, J=8.8 Hz, 2H), 2.28 (m, 2H), 2.16 (m, 2H), 1.92 (d, J = 17.0 Hz, 2H) </p>                                                |
| [Trps][OTs] | 400 MHz   | D <sub>2</sub> O | <p> <math>\delta</math>: 7.54 (d, J = 8.1 Hz, 2H), 7.21(d, J = 8.0 Hz, 2H), 3.96 (t, J = 5.3 Hz, 1H), 3.68 (s, 2H), 3.22 (m, 1H), 2.84 (m, 2H), 2.81 (m, 3H) 2.47 (m, 2H), 2.34 (d, J = 16.6 Hz, 2H), 2.28 (d, J = 9.0 Hz, 1H), 2.23 (s, 3H), 2.12 (m, 2H), 2.03 (m, 2H), 1.78 (d, J = 16.8 Hz, 2H) </p> |
| [Trps][OMs] | 400 MHz   | D <sub>2</sub> O | <p> <math>\delta</math>: 3.91 (t, J = 5.1 Hz, 1H), 3.79 (s, 2H), 3.41 (m, 1H), 3.33 (m, 2H), 2.92 (m, 3H), 2.85 (dd, J = 14.8, 7.5 Hz, 2H), 2.56(s, 3H), 2.46 (d, J = 15.8 Hz, 2H), 2.38 (d, J=8.3 Hz, 2H), 2.22 (m, 2H), 2.12 (m, 2H), 1.83 (d, J = 16.2 Hz, 2H) </p>                                   |

---

|                                         |         |                  |                                                                                                                                                                                                                                                     |
|-----------------------------------------|---------|------------------|-----------------------------------------------------------------------------------------------------------------------------------------------------------------------------------------------------------------------------------------------------|
| [Trps][OTf]                             | 400 MHz | D <sub>2</sub> O | <p>δ: 4.16 (t, J = 5.8 Hz, 1H), 3.91 (s, 2H), 3.52 (m, 1H), 3.43 (m, 2H), 3.03 (m, 3H), 2.97 (dd, J = 15.3, 8.2 Hz, 2H), 2.56 (d, J = 16.9 Hz, 2H), 2.47 (d, J=9.3 Hz, 2H), 2.33 (m, 2H), 2.26 (m, 2H), 1.96 (d, J = 17.6 Hz, 2H)</p>               |
| [Trps][HSO <sub>4</sub> ]               | 400 MHz | D <sub>2</sub> O | <p>δ 12.92 (s, 1H), 4.01 (t, J = 5.3 Hz, 1H), 3.79 (s, 2H), 3.38 (m, 1H), 3.26 (m, 2H), 2.88 (m, 3H), 2.83 (dd, J = 14.8, 7.6 Hz, 2H), 2.56 (d, J = 15.8 Hz, 2H), 2.38 (d, J=8.2 Hz, 2H), 2.24 (m, 2H), 2.08 (m, 2H), 1.88 (d, J = 16.3 Hz, 2H)</p> |
| [Trps][H <sub>2</sub> PO <sub>4</sub> ] | 400 MHz | D <sub>2</sub> O | <p>δ: 11.11(s, 2H), 3.96 (t, J = 5.3 Hz, 1H), 3.66 (s, 2H), 3.38 (m, 1H), 3.29 (m, 2H), 2.89 (m, 3H), 2.78 (dd, J = 13.8, 6.9 Hz, 2H), 2.41 (d, J = 15.9 Hz, 2H), 2.32 (d, J=7.9 Hz, 2H), 2.17 (m, 2H), 2.09(m, 2H), 1.79 (d, J = 16.7 Hz, 2H)</p>  |
| [Trps][ClO <sub>4</sub> ]               | 400 MHz | D <sub>2</sub> O | <p>δ: 3.91 (t, J = 5.39 Hz, 1H), 3.77 (s, 2H), 3.35(m, 1H), 3.24 (m, 2H), 2.83 (m, 3H), 2.75 (dd, J = 14.2, 6.4 Hz, 2H), 2.32 (d, J = 15.9 Hz, 2H), 2.29 (d, J=7.5 Hz, 2H), 2.18 (m, 2H), 2.08 (m, 2H), 1.82 (d, J = 16.1 Hz, 2H)</p>               |
| [Trps][BF <sub>4</sub> ]                | 400 MHz | D <sub>2</sub> O | <p>δ: 3.89 (t, J = 5.52 Hz, 1H), 3.79 (s, 2H), 3.41 (m, 1H), 3.39 (m, 2H), 3.02 (m, 3H), 2.98 (dd, J = 15.4, 8.1 Hz, 2H), 2.55 (d, J = 16.8 Hz, 2H), 2.47 (d, J=9.1 Hz, 2H), 2.31 (m, 2H), 2.26 (m, 2H), 1.98 (d, J = 17.3 Hz, 2H)</p>              |
| [Trps][PF <sub>6</sub> ]                | 400 MHz | D <sub>2</sub> O | <p>δ: 4.16 (t, J = 5.8 Hz, 1H), 3.93 (s, 2H), 3.56 (m, 1H), 3.44 (m, 2H), 3.08 (m, 3H), 3.12 (dd, J = 15.8, 8.2 Hz, 2H), 2.56 (d, J = 17.1 Hz, 2H), 2.51 (d, J=9.2 Hz, 2H), 2.38 (m, 2H), 2.27 (m, 2H), 2.01 (d, J = 17.8 Hz, 2H)</p>               |

---

**Table S5.** Calculation and comparison of  $H_0$  values for 25 mmol·L<sup>-1</sup> [Trps][anion] with 0.01 g·L<sup>-1</sup> crystal violet at 20A.

| ILs                                     | $A_{\max}$ | $[I](\%)$ | $[I](\%)$ | $H_0$  |
|-----------------------------------------|------------|-----------|-----------|--------|
| blank                                   | 0.7080     | 100       | -         | -      |
| [Trps][BF <sub>4</sub> ]                | 0.5540     | 78.25     | 21.75     | 1.3560 |
| [Trps][H <sub>2</sub> PO <sub>4</sub> ] | 0.4230     | 59.75     | 40.25     | 0.9715 |
| [Trps][ClO <sub>4</sub> ]               | 0.2732     | 38.59     | 61.41     | 0.5983 |
| [Trps][OMs]                             | 0.2453     | 34.65     | 65.35     | 0.5244 |
| [Trps][OTs]                             | 0.2343     | 33.09     | 66.91     | 0.4942 |
| [Trps][PF <sub>6</sub> ]                | 0.2210     | 31.21     | 68.79     | 0.4569 |
| [Trps][OTf]                             | 0.1962     | 27.71     | 72.29     | 0.3836 |
| H <sub>2</sub> SO <sub>4</sub>          | 0.1900     | 26.84     | 73.16     | 0.3644 |
| [Trps][HSO <sub>4</sub> ]               | 0.1200     | 16.95     | 83.05     | 0.1098 |
